# Supplementary material
Source: Springer Nature journal article supplement (https://www.springermedizin.de/resource/supplementary/12943_2009_640_MOESM2_ESM.pdf/9554462)

**A**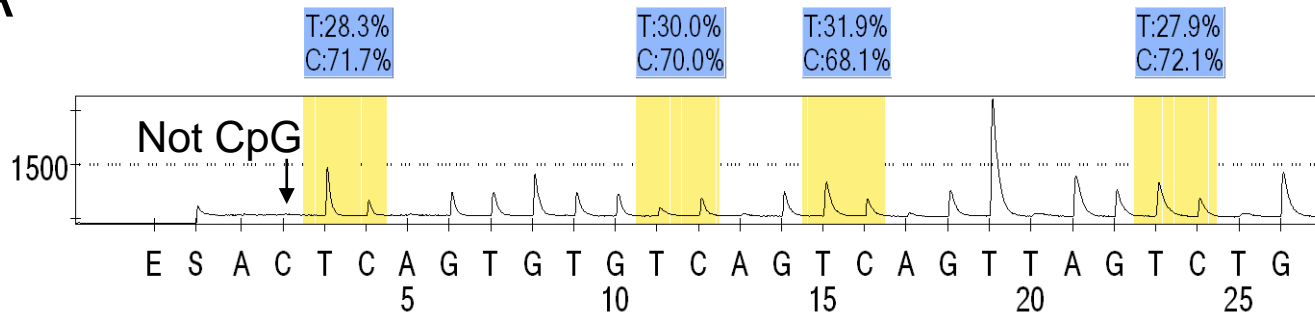

LINE-1 methylation level, 70.5

**B**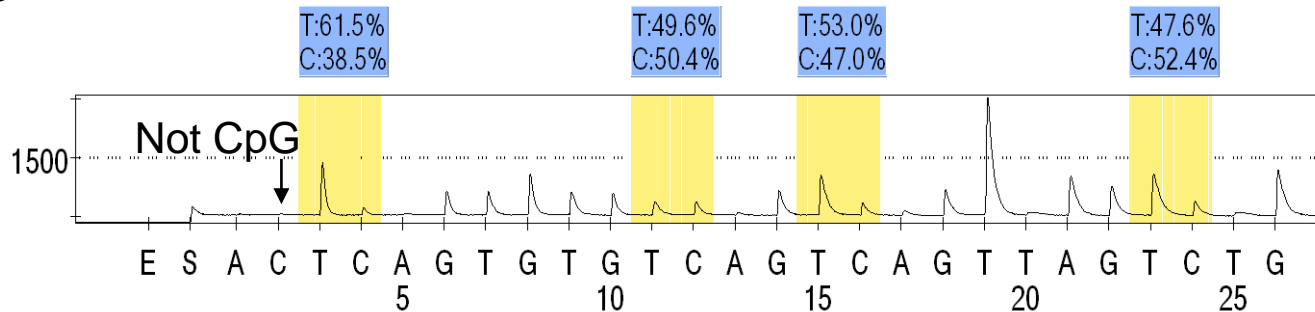

LINE-1 methylation level, 47.1

Supplement: MOESM2 [file 9554462]
